# Supplementary material for: Bacterial community structure and novel species of magnetotactic bacteria in sediments from a seamount in the Mariana volcanic arc
Source: PubMed Central journal article supplement (PMC5740136; doi:10.1038/s41598-017-17445-4), 2017-12-21
Supplement: 41598_2017_17445_MOESM1_ESM.pdf [file 41598_2017_17445_MOESM1_ESM.pdf]

1 **Supplementary Information**

2

3 **Bacterial community structure and novel species of magnetotactic bacteria in sediments from a**  
4 **seamount in the Mariana volcanic arc**

5

6 Jia Liu<sup>1,2,3#</sup>, Wen-Yan Zhang<sup>1,2,5#</sup>, Xuegong Li<sup>4,5</sup>, Xuegang Li<sup>1,2</sup>, Xumiao Chen<sup>6</sup>, Jin-Hua Li<sup>5,7</sup>, Zhaojie  
7 Teng<sup>1,2,3</sup>, Cong Xu<sup>1,2,3</sup>, Claire-Lise Santini<sup>5,8</sup>, Li Zhao<sup>1,2</sup>, Yuan Zhao<sup>1,2</sup>, Heng Zhang<sup>7</sup>, Wei-Jia Zhang<sup>4,5</sup>,  
8 Kuidong Xu<sup>6</sup>, Chaolun Li<sup>1,2</sup>, Yongxin Pan<sup>5,7</sup>, Tian Xiao<sup>1,2,5\*</sup>, Hong-Miao Pan<sup>1,2,5\*</sup> and Long-Fei Wu<sup>5,8\*</sup>

9

10 <sup>1</sup> CAS Key Laboratory of Marine Ecology and Environmental Sciences, Institute of Oceanology, Chinese  
11 Academy of Sciences, Qingdao 266071, China.

12 <sup>2</sup> Laboratory for Marine Ecology and Environmental Science, Qingdao National Laboratory for Marine  
13 Science and Technology, Qingdao 266071, China.

14 <sup>3</sup> University of Chinese Academy of Sciences, Beijing 100864, China.

15 <sup>4</sup> Laboratory of Deep Sea Microbial Cell Biology, Institute of Deep Sea Science and Engineering, Chinese  
16 Academy of Sciences, Sanya, 572000, China.

17 <sup>5</sup> International Associated Laboratory of Evolution and Development of Magnetotactic Multicellular  
18 Organisms (LIA-MagMC), CNRS-CAS, Marseille-Beijing-Qingdao-Sanya.

19 <sup>6</sup> Department of Marine Organism Taxonomy and Phylogeny, Institute of Oceanology, Chinese Academy of  
20 Sciences, Qingdao 266071, China.

21 <sup>7</sup> Paleomagnetism and Geochronology Lab, Key Laboratory of the Earth's Deep Interior, Institute of  
22 Geology and Geophysics, Chinese Academy of Sciences, Beijing 100029, China.

23 <sup>8</sup> Aix Marseille University, CNRS, LCB, Marseille, France.

24 <sup>#</sup>These authors contributed equally to this work.

25 \*Correspondence: 1. Long-Fei Wu. LCB, UMR7283, IMM, CNRS; 31, chemin Joseph Aiguier, 13402,  
26 Marseille, cedex 20, France; E-mail: [wu@imm.cnrs.fr](mailto:wu@imm.cnrs.fr); Tel.: 33-4-9116 4157; Fax: 33-4-9171 8914.

27 2. Tian Xiao, KLMEES, IOCAS; 7, Nanhai Road, 266071, Qingdao, Shandong, P. R. China; E-mail:  
28 [txiao@qdio.ac.cn](mailto:txiao@qdio.ac.cn); Tel.: 86-532-82898584; Fax: 86-532-82898586.

29 3. Hongmiao Pan, KLMEES, IOCAS; 7, Nanhai Road, 266071, Qingdao, Shandong, P. R. China; E-mail:  
30 [panhongmiao@qdio.ac.cn](mailto:panhongmiao@qdio.ac.cn); Tel.: 86-532-82898593; Fax: 86-532-82898586.

31

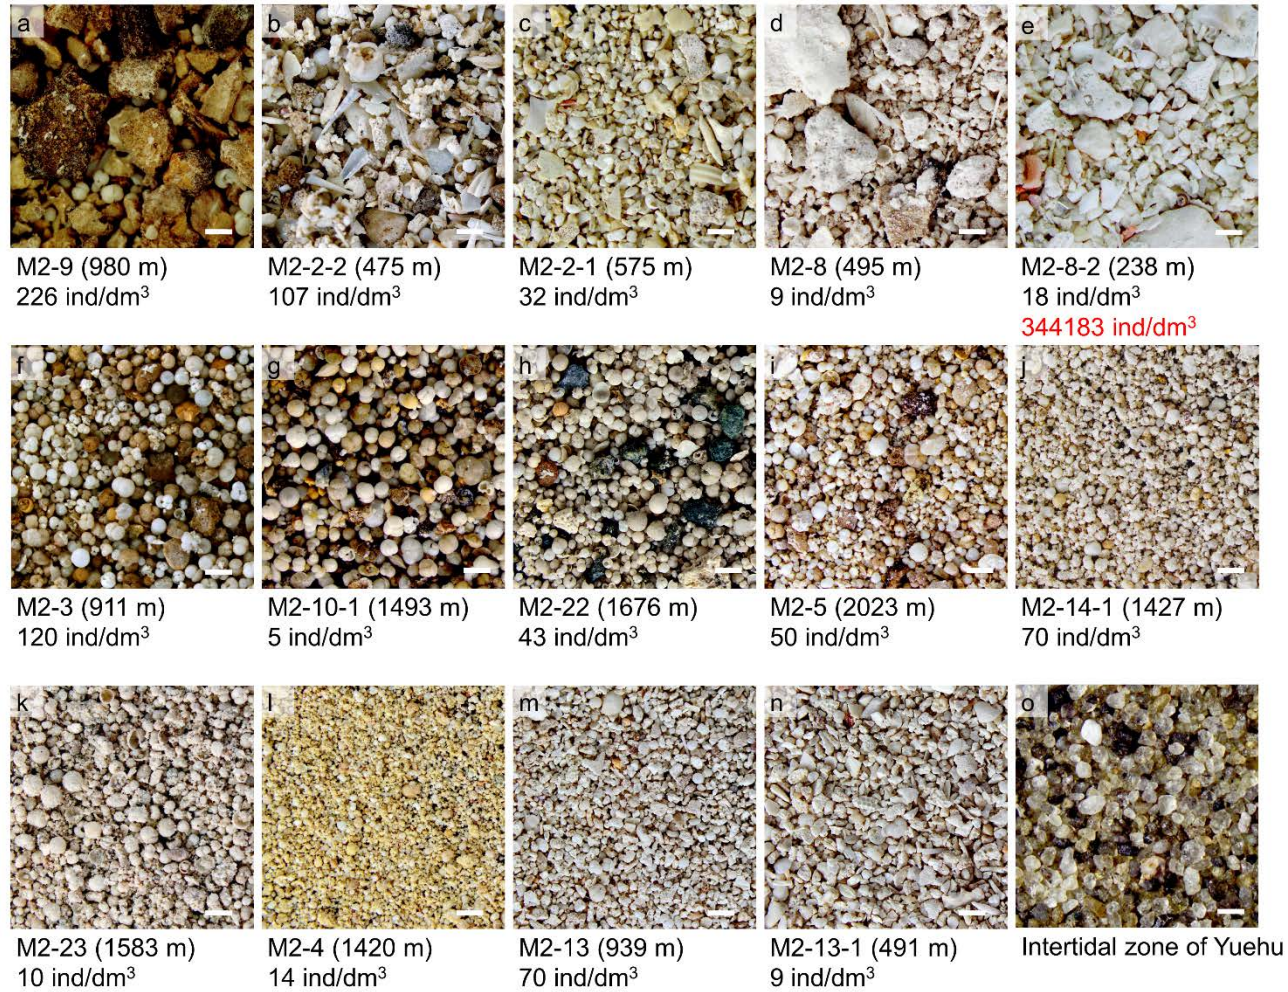

32 **Supplementary Figure S1. Stereomicroscope images of sediments.**

33 Panels a–n show stereomicroscope images of the sediments from 14 stations of the Kexue seamount. Red numbers indicate MTB abundance, determined after laboratory

34 storage. Panel o shows sediments from the intertidal zone at Yuehu. The scale bars are 1 mm.

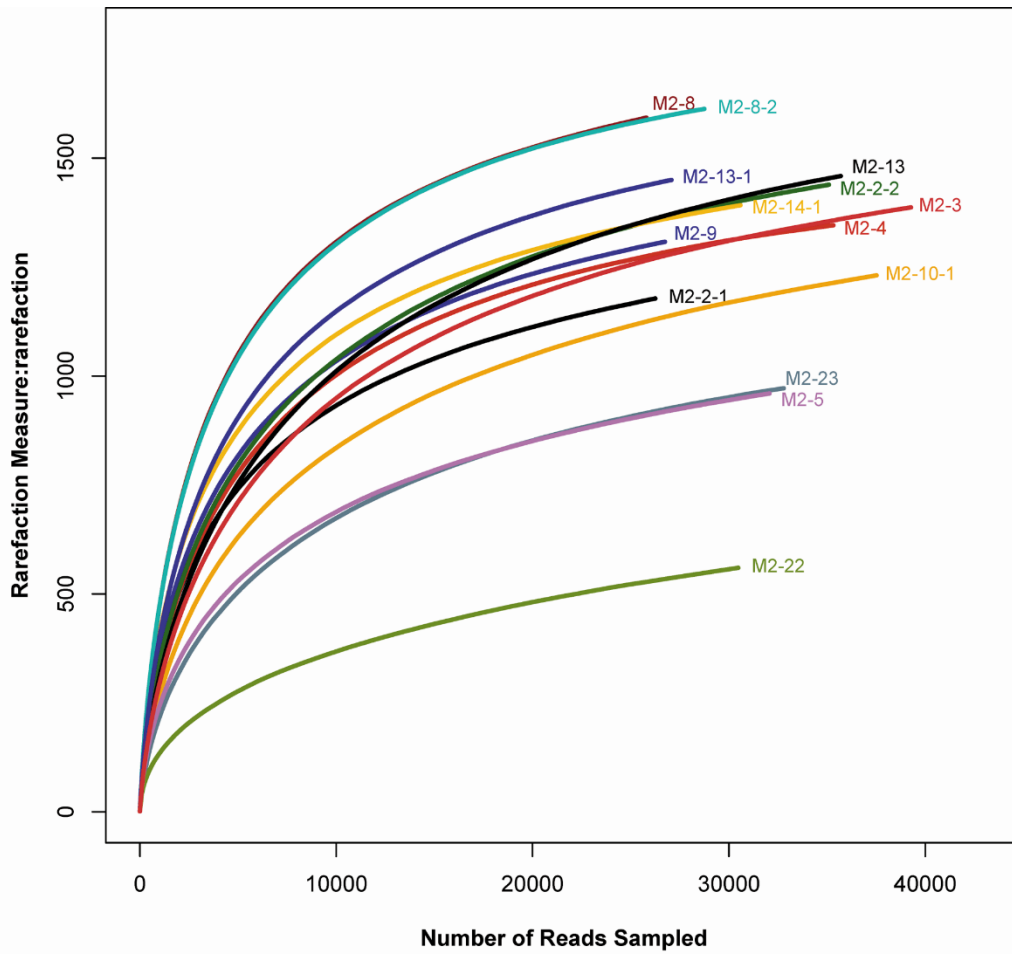

35 **Supplementary Figure S2. Rarefaction curves at 3% difference levels.**

36 Rarefaction curves for seamount sediment bacterial communities using 16S rRNA gene  
 37 sequences at 3% difference levels.

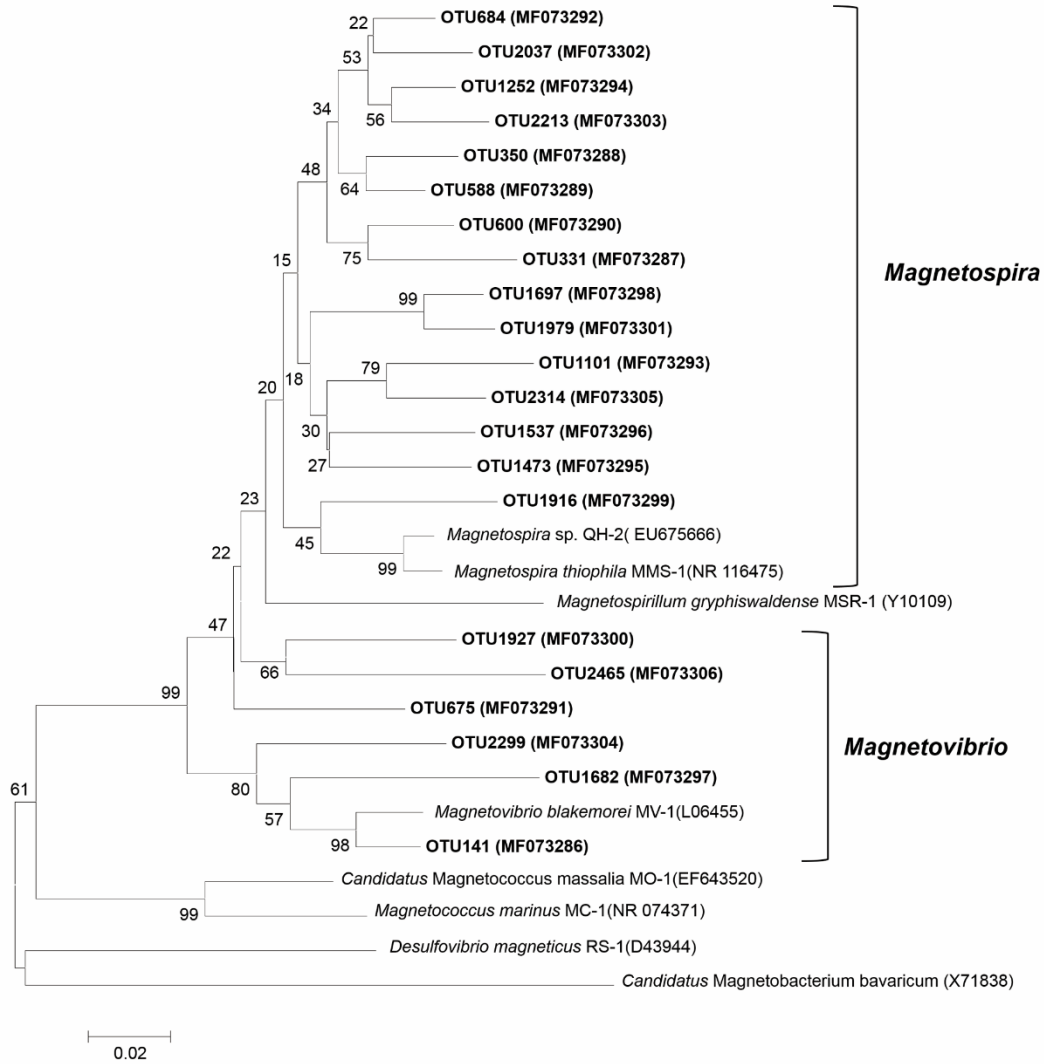

38 **Supplementary Figure S3. Phylogenetic tree based on partial 16S rRNA gene sequences**  
 39 **(approximately 450 bp) of the 21 OTUs related to magnetotactic bacteria from Kexue**  
 40 **seamount.**

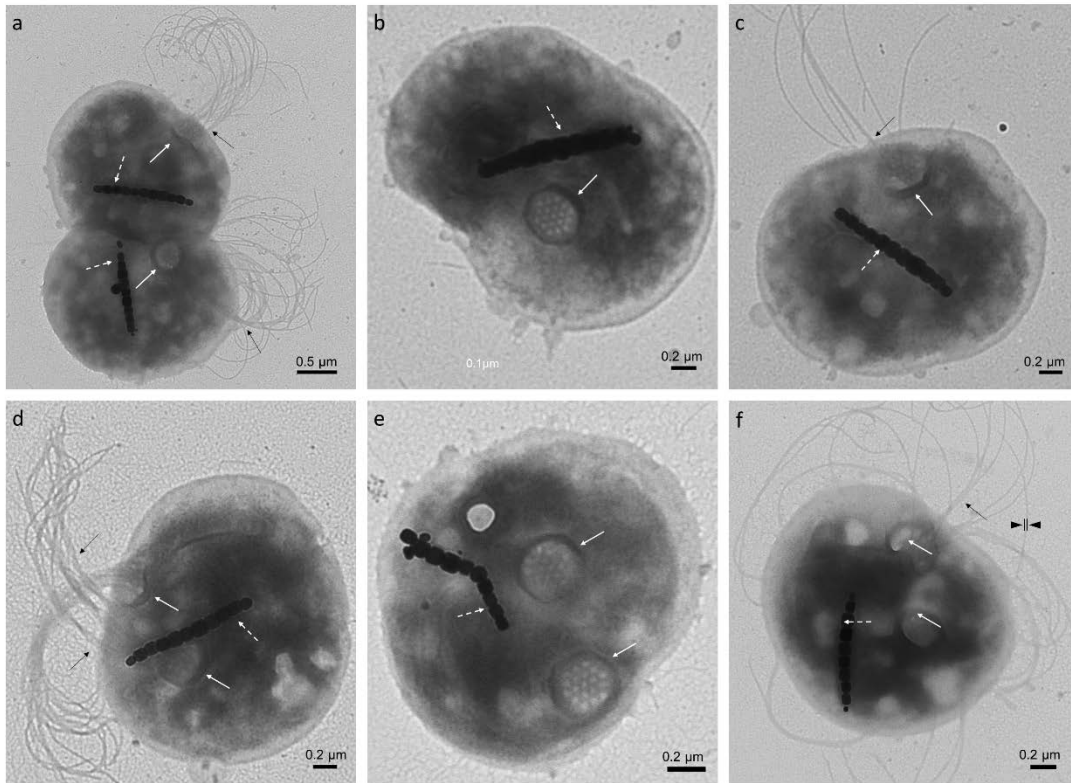

41 **Supplementary Figure S4. Flagella and Flagellar base platform.**

42 Flagella, flagellar base platforms, and magnetosomes are indicated by black arrows, white  
 43 arrows, and white dashed arrows, respectively. Panels a–c show magnetotactic cocci each  
 44 having one flagellar base platform. Panels d–f show magnetotactic cocci each having two  
 45 flagellar base platforms. The diameter of the flagella is indicated by black arrow heads.

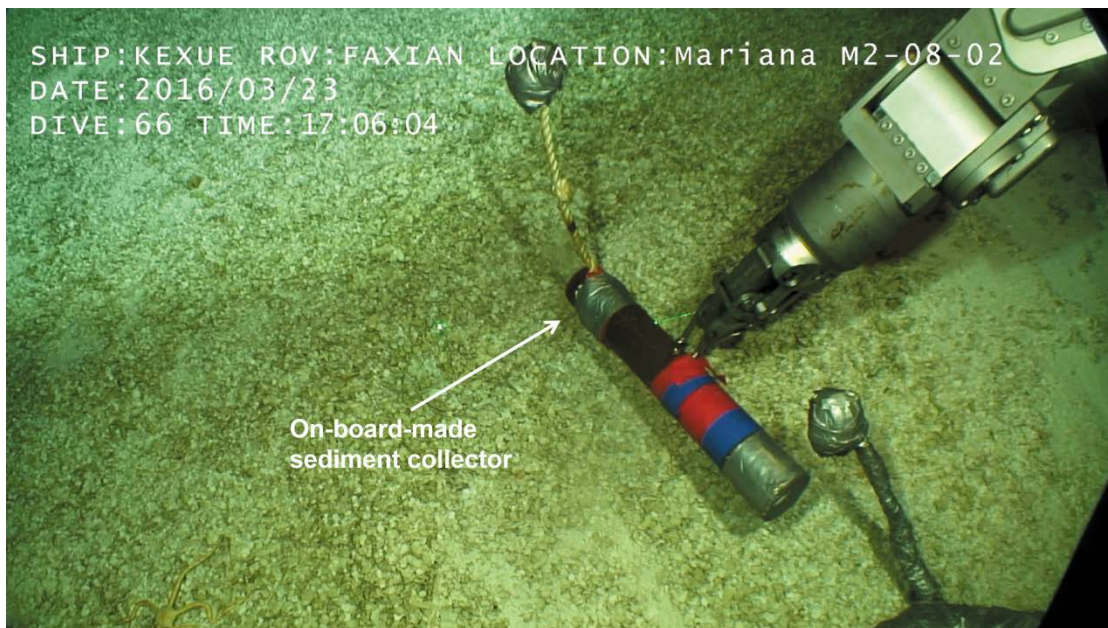

46 **Supplementary Figure S5. ROV sampling and custom-made sediment collector.**

| Station | Reads  | OTUs  | Ace   | Chao  | Coverage | Shannon | Simpson |
|---------|--------|-------|-------|-------|----------|---------|---------|
| M2-2-1  | 26,252 | 1,178 | 1,344 | 1,374 | 0.991    | 5.65    | 0.0087  |
| M2-8-2  | 28,749 | 1,613 | 1,739 | 1,779 | 0.992    | 6.35    | 0.0039  |
| M2-23   | 32,791 | 972   | 1,153 | 1,171 | 0.993    | 4.00    | 0.0968  |
| M2-22   | 30,474 | 560   | 934   | 790   | 0.994    | 3.93    | 0.0462  |
| M2-10-1 | 37,520 | 1,231 | 1,445 | 1,474 | 0.993    | 4.86    | 0.0280  |
| M2-5    | 32,069 | 960   | 1,147 | 1,174 | 0.993    | 4.87    | 0.0214  |
| M2-13   | 35,695 | 1,459 | 1,655 | 1,666 | 0.992    | 5.22    | 0.0204  |
| M2-13-1 | 27,072 | 1,450 | 1,607 | 1,600 | 0.991    | 5.78    | 0.0136  |
| M2-3    | 39,274 | 1,387 | 1,568 | 1,620 | 0.993    | 5.02    | 0.0256  |
| M2-9    | 26,739 | 1,308 | 1,464 | 1,475 | 0.991    | 5.66    | 0.0123  |
| M2-4    | 35,320 | 1,346 | 1,462 | 1,464 | 0.994    | 5.24    | 0.0297  |
| M2-2-2  | 35,092 | 1,439 | 1,607 | 1,612 | 0.993    | 5.32    | 0.0253  |
| M2-14-1 | 30,589 | 1,392 | 1,530 | 1,572 | 0.993    | 5.95    | 0.0078  |
| M2-8    | 25,797 | 1,593 | 1,740 | 1,787 | 0.990    | 6.31    | 0.0046  |

47

48 **Supplementary Table S1. Richness and diversity of bacteria at 3% difference levels.**

49 Chao and ACE are the estimated bacterial richness values. Shannon and Simpson refer to the

50 calculated bacterial diversity values. Coverage is the Good's coverage.

|           |      | Shannon  | MTB OTUs | MTB reads | Al      | Fe      | Mn      | Co      | Cu      | Zn      | Se    | Pb      | Ni    |
|-----------|------|----------|----------|-----------|---------|---------|---------|---------|---------|---------|-------|---------|-------|
| MTB OTUs  | P    | 0.809**  |          |           |         |         |         |         |         |         |       |         |       |
|           | Sig. | <0.001   |          |           |         |         |         |         |         |         |       |         |       |
| MTB_reads | P    | 0.610*   | 0.797**  |           |         |         |         |         |         |         |       |         |       |
|           | Sig. | 0.020    | 0.001    |           |         |         |         |         |         |         |       |         |       |
| Al        | P    | -0.705** | -0.510   | -0.334    |         |         |         |         |         |         |       |         |       |
|           | Sig. | 0.005    | 0.063    | 0.243     |         |         |         |         |         |         |       |         |       |
| Fe        | P    | -0.804** | -0.609*  | -0.439    | 0.892** |         |         |         |         |         |       |         |       |
|           | Sig. | 0.001    | 0.021    | 0.117     | <0.001  |         |         |         |         |         |       |         |       |
| Mn        | P    | -0.645*  | -0.540*  | -0.396    | 0.778** | 0.725** |         |         |         |         |       |         |       |
|           | Sig. | 0.013    | 0.046    | 0.161     | 0.001   | 0.003   |         |         |         |         |       |         |       |
| Co        | P    | -0.428   | -0.410   | -0.402    | 0.307   | 0.572*  | 0.440   |         |         |         |       |         |       |
|           | Sig. | 0.127    | 0.145    | 0.154     | 0.285   | 0.033   | 0.116   |         |         |         |       |         |       |
| Cu        | P    | -0.734** | -0.545*  | -0.422    | 0.686** | 0.912** | 0.592*  | 0.534*  |         |         |       |         |       |
|           | Sig. | 0.003    | 0.044    | 0.133     | 0.007   | <0.001  | 0.026   | 0.049   |         |         |       |         |       |
| Zn        | P    | -0.830** | -0.525   | -0.367    | 0.834** | 0.917** | 0.774** | 0.395   | 0.904** |         |       |         |       |
|           | Sig. | <0.001   | 0.054    | 0.196     | <0.001  | <0.001  | 0.001   | 0.162   | <0.001  |         |       |         |       |
| Se        | P    | 0.031    | -0.024   | 0.054     | 0.241   | 0.125   | 0.293   | 0.061   | -0.013  | 0.081   |       |         |       |
|           | Sig. | 0.916    | 0.935    | 0.855     | 0.407   | 0.670   | 0.309   | 0.836   | 0.964   | 0.782   |       |         |       |
| Pb        | P    | -0.626*  | -0.367   | -0.362    | 0.671** | 0.769** | 0.638*  | 0.717** | 0.616*  | 0.697** | 0.207 |         |       |
|           | Sig. | 0.017    | 0.197    | 0.203     | 0.009   | 0.001   | 0.014   | 0.004   | 0.019   | 0.006   | 0.477 |         |       |
| Ni        | P    | -0.779** | -0.659*  | -0.539*   | 0.595*  | 0.680** | 0.841** | 0.52    | 0.570*  | 0.716** | 0.066 | 0.698** |       |
|           | Sig. | 0.001    | 0.010    | 0.047     | 0.025   | 0.008   | <0.001  | 0.057   | 0.033   | 0.004   | 0.823 | 0.006   |       |
| IP        | P    | 0.046    | 0.011    | 0.072     | 0.407   | 0.282   | 0.567*  | 0.130   | 0.216   | 0.330   | 0.160 | 0.228   | 0.253 |
|           | Sig. | 0.875    | 0.971    | 0.807     | 0.148   | 0.328   | 0.035   | 0.659   | 0.458   | 0.249   | 0.585 | 0.433   | 0.383 |

51 **Supplementary Table S2. Correlation analysis between bacterial diversity and chemical**  
52 **elements in sediments at Kexue seamount.**

53 \*: Correlation is significant at the 0.05 level (two-tailed); \*\*: Correlation is significant at the  
54 0.01 level (two-tailed); P: Pearson correlation coefficient; Sig. : Significance, P value; N=14;  
55 IP indicates the concentration of inorganic phosphorus ( $\mu\text{g/g}$ ).

56



| OTU   | MTB related Blast-hit results                       | Identity | Novel species            |
|-------|-----------------------------------------------------|----------|--------------------------|
| OTU6  | Magnetic coccus rj516 from Itaipu lagoon (Y13209)   | 97.3%    | known species            |
| OTU12 | Magnetic coccus rj12 from Itaipu lagoon (Y13215)    | 97.3%    | known species            |
| OTU1  | Magnetic coccus rj516 from Itaipu lagoon (Y13209)   | 98.2%    | known species            |
| OTU3  | Magnetic coccus rj12 from Itaipu lagoon (Y13215)    | 96.7%    | novel species*           |
| OTU8  | Magnetic coccus rj12 from Itaipu lagoon (Y13215)    | 96.2%    | novel species*           |
| OTU13 | Magnetic coccus MRG-138 from HuiQuan Bay (KM099217) | 93.0%    | novel genus <sup>1</sup> |
| OTU19 | Magnetic coccus MRG-138 from HuiQuan Bay (KM099217) | 92.7%    | novel genus <sup>1</sup> |
| OTU14 | Magnetic coccus rj12 from Itaipu lagoon (Y13215)    | 93.0%    | novel genus <sup>2</sup> |
| OTU17 | Magnetic coccus rj12 from Itaipu lagoon (Y13215)    | 92.6%    | novel genus <sup>2</sup> |
| OTU2  | Magnetic coccus MRG-138 from HuiQuan Bay (KM099217) | 90.9%    | novel genus              |
| OTU4  | Magnetic coccus rj12 from Itaipu lagoon (Y13215)    | 94.3%    | novel genus              |
| OTU5  | Magnetic coccus M-67 from Jiaozhou Bay (EF371491)   | 93.2%    | novel genus              |
| OTU7  | Magnetic coccus MRG-138 from HuiQuan Bay (KM099217) | 89.8%    | novel genus              |
| OTU9  | Magnetic coccus rj12 from Itaipu lagoon (Y13215)    | 94.7%    | novel genus              |
| OTU10 | Magnetic coccus M-67 from Jiaozhou Bay (EF371491)   | 88.6%    | novel genus              |
| OTU11 | Magnetic coccus M-67 from Jiaozhou Bay (EF371491)   | 93.2%    | novel genus              |
| OTU15 | Magnetic coccus MRC-12 from Yuehu lagoon (KJ591590) | 89.3%    | novel genus              |
| OTU16 | Magnetic coccus M-67 from Jiaozhou Bay (EF371491)   | 90.2%    | novel genus              |
| OTU18 | Magnetic coccus rj12 from Itaipu lagoon (Y13215)    | 91.9%    | novel genus              |

57 **Supplementary Table S3. MTB-related OTUs identified from the clone library.**

58 \*OTU3 and OTU8 are novel species belonging to a known genus. <sup>1</sup>OTU13 and OTU19  
59 belong to a novel genus. <sup>2</sup>OTU14 and OTU17 belong to a novel genus. OTU1, OTU6 and  
60 OTU12 are known species. Other OTUs represented 10 novel genera, respectively.
